# Supplementary material
Source: Springer Nature journal article supplement (https://www.springermedizin.de/resource/supplementary/12889_2007_1098_MOESM1_ESM.pdf/9502446)

### Overweight Females

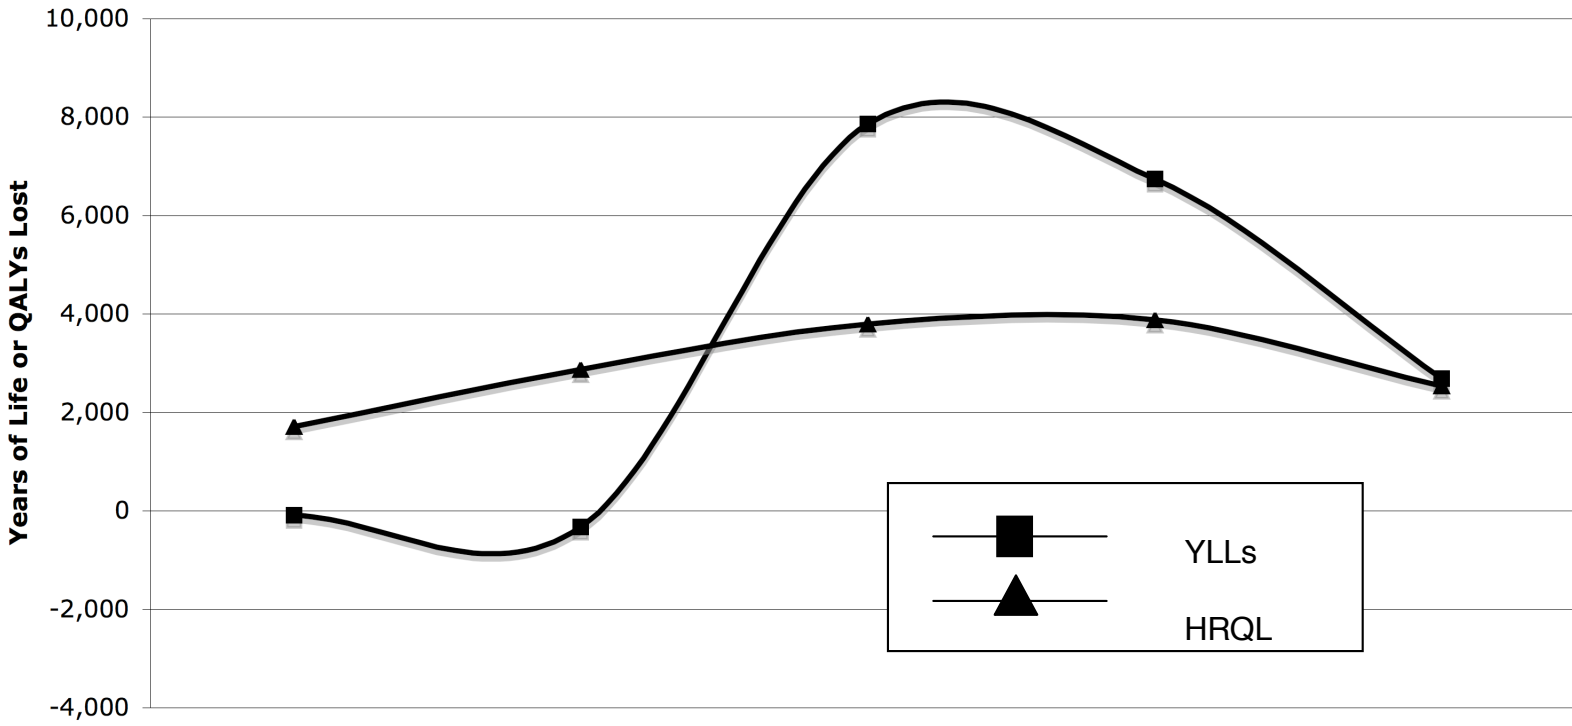

### Obese Females

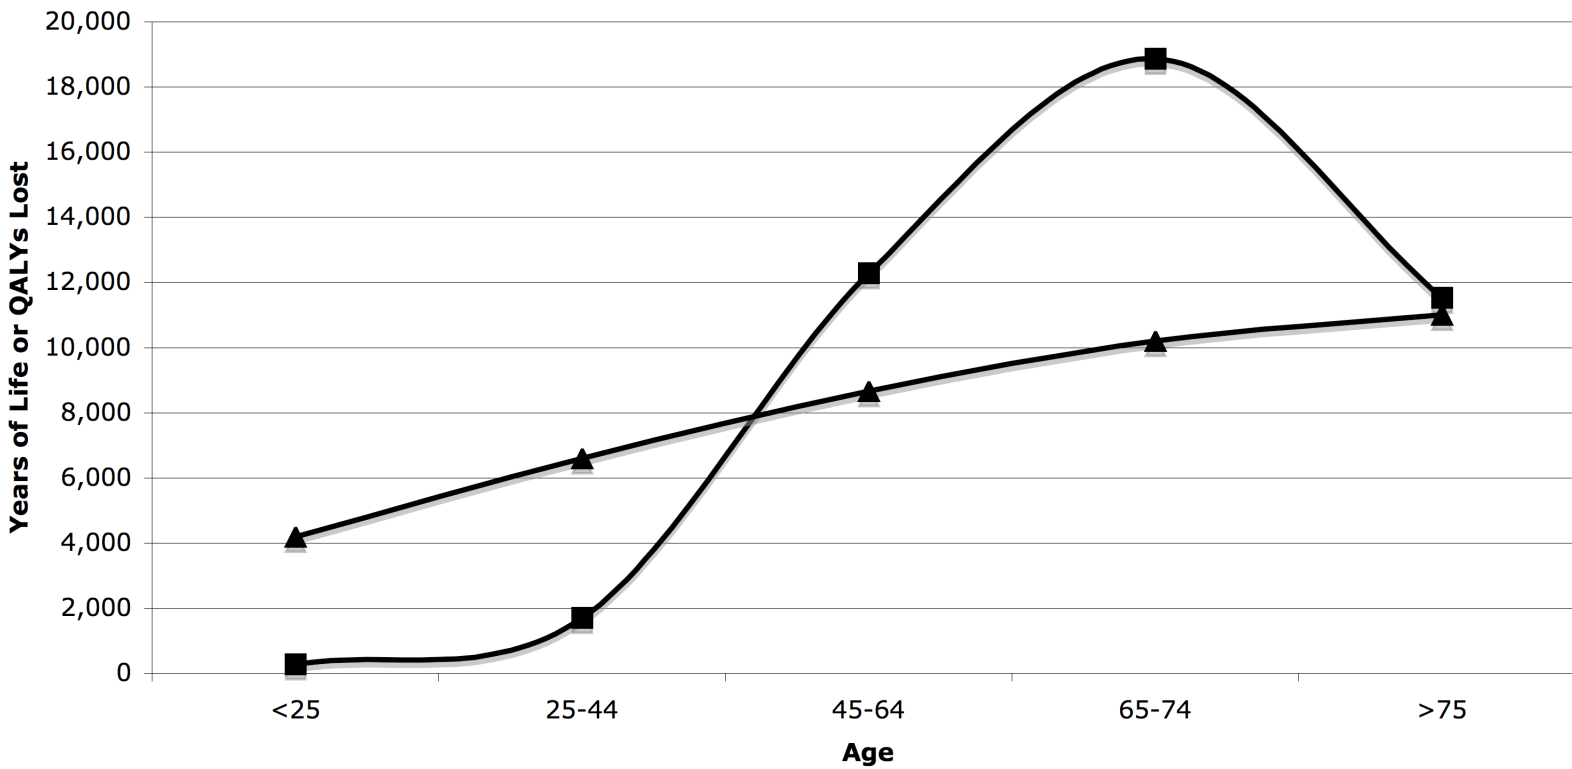

Supplement: MOESM1 [file 9502446]
